# Supplementary material for: Insecticidal Effect of the Entomopathogenic Fungus Lecanicillium araneicola HK-1 in Aphis craccivora (Hemiptera: Aphididae)
Source: MDPI journal article supplement (doi:10.3390/insects14110860), 2023-11-06
Supplement: s1 [file s1]

Supplemental materials

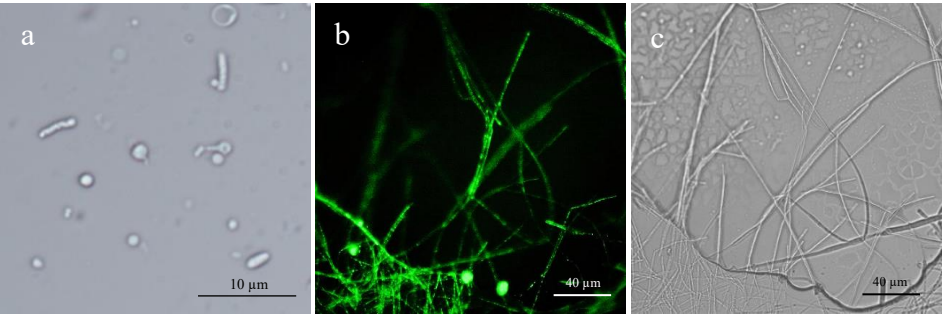

**Figure S1.** Fluorescence performance of strain HK-1-GFP. **a** Protoplast. **b** Mycelia under blue light. **c** Mycelia under white light.

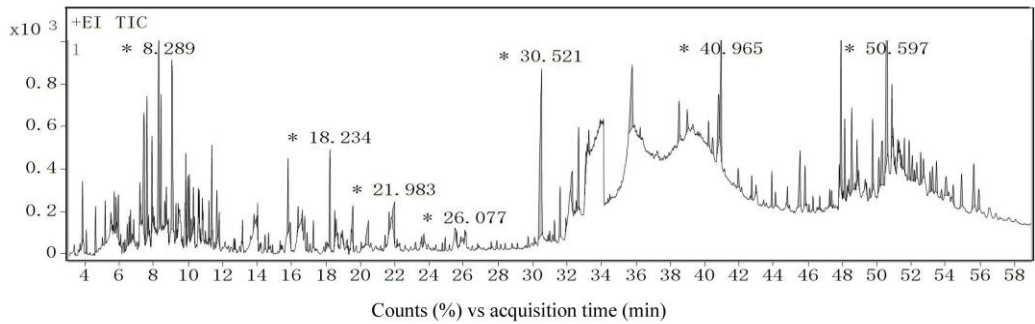

**Figure S2.** Total ions chromatogram composition of No.3 component.

**Table S1.** Primer sequences used in qRT-PCR.

| Gene           | Accession no.  | Primer sequences (5'-3') |
|----------------|----------------|--------------------------|
| <i>GST-S1</i>  | MT130840.1     | F: CGACATCACTGCTCTGGCTG  |
|                |                | R: TGCCAAATGGCATAGTCGGT  |
| <i>GST-D1</i>  | MT130836.1     | F: GTGACGACTCCGAGCAAAGG  |
|                |                | R: GCAAATTGCTCGGCTTTTCGC |
| <i>GST-D2</i>  | MT130837.1     | F: AGATCCGTTTTGCTGACCGC  |
|                |                | R: CACGATGATTGCACGGCTCT  |
| <i>CarE1</i>   | KAF0769975.1   | F: AGCGGGCCCATATCTGGAAT  |
|                |                | R: GTCGATGCGTTCCACACTCC  |
| <i>CarE2</i>   | KAF0769984.1   | F: GGCGATCTGTTGCTCGTTGA  |
|                |                | R: ACACACCCACCTTGAAACGG  |
| <i>CarE3</i>   | KAF0769982.1   | F: CGGTTGCGGTCCACACTATC  |
|                |                | R: AGAGCTGCCACCTGATCCTT  |
| <i>AChE-X1</i> | KAF0771168.1   | F: TTTTCGGTGAATCGGCAGGC  |
|                |                | R: TCCCGTGACAAAATTGCCCA  |
| <i>RPS8</i>    | GAJW01000269.1 | F: GTCGTCCGAGCCATTCTTT   |
|                |                | R: TCCTGTCTTCCTGCGTTTATG |

**Table S2.** The virulence test results of strain HK-1 crude extract on *A. craccivora* adults at 24 h.

| Crude extract concentration (mg mL <sup>-1</sup> ) | 24 h average mortality $\pm$ SE (%) |
|----------------------------------------------------|-------------------------------------|
| Control                                            | 10.00 $\pm$ 4.08c                   |
| 7.5                                                | 16.67 $\pm$ 6.24c                   |
| 15                                                 | 40.00 $\pm$ 10.80b                  |
| 30                                                 | 53.33 $\pm$ 10.27b                  |
| 60                                                 | 76.67 $\pm$ 4.71a                   |
| 120                                                | 90.00 $\pm$ 4.08a                   |

Different little letters in the table indicate significant differences between different treatments ( $P < 0.05$ ).

**Table S3.** The virulence test results of acetamiprid on *A. craccivora* adults at 48 h.

| acetamiprid concentration ( $\mu$ g mL <sup>-1</sup> ) | 48 h average mortality $\pm$ SE (%) |
|--------------------------------------------------------|-------------------------------------|
| Control                                                | 1.67 $\pm$ 0.03e                    |
| 0.5                                                    | 15.67 $\pm$ 0.03d                   |
| 1                                                      | 28.33 $\pm$ 0.03d                   |
| 2                                                      | 55 $\pm$ 0.10c                      |
| 4                                                      | 81.67 $\pm$ 0.03b                   |
| 8                                                      | 85 $\pm$ 0.05b                      |
| 12                                                     | 95 $\pm$ 0.00a                      |

Different little letters in the table indicate significant differences between different treatments ( $P < 0.05$ ).

**Table S4** Toxicity of isolated components on *A. craccivora* adults after 24 h

| Component (10 mg mL <sup>-1</sup> ) | 24 h average mortality $\pm$ SE (%) |
|-------------------------------------|-------------------------------------|
| 3                                   | 64.44 $\pm$ 16.78a                  |
| 12                                  | 44.44 $\pm$ 20.37a                  |
| Crude extract                       | 13.33 $\pm$ 17.64b                  |
| Acetone control                     | 6.67 $\pm$ 6.67b                    |

Different little letters in the table indicate significant differences between different treatments ( $P < 0.05$ ).

**Table S5.** Compound composition and percentage content of No. 3 component.

| Peak | Rt <sup>a</sup> (min) | Compound name                      | Peak area (%) |
|------|-----------------------|------------------------------------|---------------|
| 4    | 4.615                 | 2-Pentanone, 4-hydroxy-4-methyl-   | 0.65          |
| 6    | 5.177                 | Benzene, 1, 3-dimethyl-            | 0.51          |
| 7    | 5.507                 | Cyclohexanol                       | 0.14          |
| 8    | 5.704                 | Benzene, 1, 3-dimethyl-            | 0.48          |
| 9    | 5.814                 | Nonane                             | 0.34          |
| 10   | 5.95                  | Cyclohexanol, 1-ethyl-             | 0.80          |
| 11   | 6.077                 | 4-Methyl-1, 6-heptadien-4-ol       | 0.14          |
| 12   | 6.316                 | 1H-Indene, octahydro-, cis-        | 0.15          |
| 13   | 6.454                 | Benzene, (1-methylethyl)-          | 0.35          |
| 14   | 6.565                 | Cyclohexane, propyl-               | 0.34          |
| 15   | 6.641                 | Octane, 3, 6-dimethyl-             | 0.42          |
| 16   | 6.75                  | Acetic acid, methoxy-, ethyl ester | 0.07          |
| 17   | 6.832                 | Heptane, 3-ethyl-2-methyl-         | 0.28          |
| 18   | 7.187                 | Benzene, propyl-                   | 0.46          |

| Peak | Rt <sup>a</sup> (min) | Compound name                                    | Peak area (%) |
|------|-----------------------|--------------------------------------------------|---------------|
| 19   | 7.425                 | Undecane, 5, 5-dimethyl-                         | 3.10          |
| 20   | 7.6                   | Benzene, 1-ethyl-3-methyl-                       | 2.37          |
| 21   | 7.686                 | Cyclohexane, 1-methyl-4-(1-methylethyl)-, trans- | 0.23          |
| 22   | 7.749                 | m-Menthane                                       | 0.07          |
| 23   | 7.89                  | 2, 6-Xylidine                                    | 1.23          |
| 25   | 8.023                 | Cyclohexane, 1-methyl-3-propyl-                  | 0.11          |
| 26   | 8.289                 | Benzenamine, 2-ethyl-                            | 4.24          |
| 27   | 8.418                 | Decane                                           | 1.94          |
| 28   | 8.637                 | Benzene, (2-methylpropyl)-                       | 0.43          |
| 29   | 8.726                 | Benzene, 1-methyl-4-propyl-                      | 0.46          |
| 30   | 8.84                  | Menthyl acetate                                  | 0.24          |
| 31   | 9.044                 | <b>p-Cymene</b>                                  | 3.91          |
| 32   | 9.286                 | Cyclohex Vanillicexane, butyl-                   | 0.48          |
| 33   | 9.42                  | Benzene, cyclopropyl-                            | 0.30          |
| 34   | 9.681                 | Tetrahydro carvone                               | 0.10          |
| 35   | 9.86                  | Benzene, 1-methyl-3-propyl-                      | 0.76          |
| 36   | 9.99                  | 1, 3, 8-p-Menthatriene                           | 1.27          |
| 37   | 10.067                | Benzene, 4-ethyl-1, 2-dimethyl-                  | 0.86          |
| 38   | 10.157                | Benzene, 1, 2-diethyl-                           | 0.38          |
| 39   | 10.298                | 2-Pyridinepropanamide, N-phenyl-                 | 0.49          |
| 40   | 10.365                | Sulfurous acid, hexyl nonyl ester                | 0.19          |
| 41   | 10.591                | Benzene, 4-ethyl-1, 2-dimethyl-                  | 0.33          |
| 42   | 10.637                | o-Cymene                                         | 0.23          |
| 43   | 10.698                | Indan, 1-methyl-                                 | 0.09          |
| 44   | 10.823                | Benzene, 1-ethyl-2, 4-dimethyl-                  | 0.26          |
| 46   | 11.205                | Undecane                                         | 0.47          |
| 47   | 11.373                | Nonanal                                          | 1.25          |
| 48   | 11.667                | Phenylethyl Alcohol                              | 0.90          |
| 49   | 11.804                | 2, 4-Dimethyl-2, 4-pentanediol                   | 0.45          |
| 50   | 12.656                | Butanoic acid, 1, 1-dimethyl-2-phenylethyl ester | 0.11          |
| 51   | 12.724                | Benzene, 2-ethyl-1, 4-dimethyl-                  | 0.09          |
| 52   | 13.154                | Benzene, 1, 3-dimethoxy-                         | 0.24          |
| 53   | 13.821                | Ethanol, 1-(2-butoxyethoxy)-                     | 0.18          |
| 54   | 13.989                | Benzoic acid                                     | 0.10          |
| 55   | 14.027                | Octanoic acid                                    | 0.24          |
| 56   | 14.151                | Catechol                                         | 0.09          |
| 57   | 14.462                | 1, 3-Octanediol                                  | 0.25          |
| 58   | 14.662                | Ethanol, 2-phenoxy-                              | 0.19          |
| 59   | 14.899                | 2-Ethylhexyl acrylate                            | 0.09          |
| 60   | 15.336                | 2-Sec-Butylcyclohexanone                         | 0.10          |
| 61   | 15.798                | 2-Decenal, (E)-                                  | 1.02          |
| 62   | 15.921                | Benzeneacetic acid                               | 0.41          |
| 63   | 16.386                | Triacetone triperoxide                           | 0.37          |

| Peak | Rt <sup>a</sup> (min) | Compound name                                                                                                                                                | Peak area (%) |
|------|-----------------------|--------------------------------------------------------------------------------------------------------------------------------------------------------------|---------------|
| 64   | 16.629                | Nonanoic acid                                                                                                                                                | 0.17          |
| 65   | 16.904                | 3-tert-Butyl-2-pyrazolin-5-one                                                                                                                               | 0.30          |
| 66   | 17.073                | Formamide, N, N-dibutyl-                                                                                                                                     | 0.07          |
| 67   | 17.27                 | 2, 4-Decadienal, (E, E)-                                                                                                                                     | 0.39          |
| 68   | 17.996                | 4, 4, 6-Trimethyl-cyclohex-2-en-1-ol                                                                                                                         | 0.12          |
| 69   | 18.234                | Phenol, 2, 6-dimethoxy-                                                                                                                                      | 1.77          |
| 70   | 18.512                | 2-Undecenal                                                                                                                                                  | 0.38          |
| 71   | 18.595                | Propanoic acid, 3-chloro-, 4-formylphenyl ester                                                                                                              | 0.22          |
| 72   | 18.703                | Ethyl hydrogen succinate                                                                                                                                     | 0.10          |
| 73   | 18.96                 | Orcinol                                                                                                                                                      | 0.16          |
| 74   | 19.245                | 3-Octanol, 2, 6-dimethyl-                                                                                                                                    | 0.17          |
| 75   | 19.295                | 2, 4-Octadienoic acid, 3-methyl-, methyl ester                                                                                                               | 0.06          |
| 76   | 19.469                | Vanillin                                                                                                                                                     | 0.07          |
| 77   | 19.569                | 1-Triazene, 3, 3-dimethyl-1-phenyl-                                                                                                                          | 0.72          |
| 78   | 20.055                | 1, 4-Benzenediol, 2, 5-dimethyl-                                                                                                                             | 0.11          |
| 79   | 20.47                 | Isopentyl 3-hydroxy-2-methylenebutanoate                                                                                                                     | 0.86          |
| 80   | 21.435                | Benzoic acid, 2-(1-oxopropyl)-, methyl ester                                                                                                                 | 0.20          |
| 81   | 21.667                | Ethanone, 1-(3-hydroxy-4-methoxyphenyl)-                                                                                                                     | 0.30          |
| 82   | 21.983                | 9-Oxononanoic acid                                                                                                                                           | 1.13          |
| 83   | 22.128                | Benzeneacetic acid, 4-methoxy-                                                                                                                               | 0.08          |
| 84   | 23.198                | 5-Ethoxy-2-methyl-pyridine                                                                                                                                   | 0.11          |
| 85   | 23.564                | Dodecanoic acid                                                                                                                                              | 0.08          |
| 86   | 23.688                | Metacetamol                                                                                                                                                  | 0.15          |
| 87   | 24.763                | Tetrahydrofuran-2-one, 5-[1-hydroxyhexyl]-                                                                                                                   | 0.12          |
| 88   | 24.927                | Cyclohepta[c]pyrazole-3-carboxylic acid, 1, 4, 5, 6, 7, 8-hexahydro-                                                                                         | 0.19          |
| 89   | 25.599                | Tributyl phosphate                                                                                                                                           | 0.17          |
| 90   | 25.842                | 2-n-Heptylfuran                                                                                                                                              | 0.07          |
| 91   | 26.077                | 2-Cyclohexen-1-one, 3, 5, 5-trimethyl-4-(3-oxobutyl)-                                                                                                        | 0.09          |
| 92   | 27.605                | 4-(1, 5-Dihydroxy-2, 6, 6-trimethylcyclohex-2-enyl)but-3-en-2-one                                                                                            | 0.10          |
| 93   | 27.934                | Tetradecanoic acid                                                                                                                                           | 0.16          |
| 95   | 28.802                | 6-Methoxy-3-acetamido-2-picoline                                                                                                                             | 0.07          |
| 96   | 29.12                 | Tricosane-6, 8-dione                                                                                                                                         | 0.08          |
| 97   | 29.743                | 3-(6-Methoxy-3-methyl-2-benzofuranyl)acrylic acid                                                                                                            | 0.16          |
| 98   | 30.119                | Phthalic acid, hept-4-yl isobutyl ester                                                                                                                      | 0.11          |
| 99   | 30.521                | 4H-1-Benzopyran-4-one, 5-hydroxy-7-methoxy-2-methyl-                                                                                                         | 6.17          |
| 100  | 30.903                | beta.-Asarone                                                                                                                                                | 0.07          |
| 101  | 30.998                | 1-Phenanthrenecarboxylic acid, 7-ethyltetradecahydro-1, 4a, 7-trimethyl-, methyl ester, [1R-(1.alpha., 4a.beta., 4b.alpha., 7.beta., 8a.beta., 10a.alpha.)]- | 0.13          |
| 102  | 31.274                | Trispiro[4.2.4.2.4.2.]heneicosane                                                                                                                            | 0.30          |

| Peak | Rt <sup>a</sup> (min) | Compound name                                                    | Peak area (%) |
|------|-----------------------|------------------------------------------------------------------|---------------|
| 103  | 31.606                | Benzo[c]phenanthrene                                             | 0.83          |
| 104  | 31.94                 | Dibutyl phthalate                                                | 0.17          |
| 106  | 32.54                 | 4H-1-Benzopyran-4-one, 5, 7-dihydroxy-2-methyl-                  | 0.16          |
| 107  | 32.678                | 10-Methylanthracene-9-carboxaldehyde                             | 1.47          |
| 108  | 33.115                | Dibenzo[b, f][1, 4]diazocine                                     | 0.51          |
| 111  | 33.929                | 9, 12-Octadecadienoic acid (Z, Z)-, methyl ester                 | 0.09          |
| 112  | 34.494                | 9-Octadecenoic acid, methyl ester, (E)-                          | 0.07          |
| 113  | 35.786                | 9, 12-Octadecadienoic acid (Z, Z)-                               | 2.55          |
| 115  | 38.514                | Benzene, 1-butyl-4-[(4-ethylphenyl)ethynyl]-                     | 0.82          |
| 117  | 40.223                | Coniferyl aldehyde, TBDMS derivative                             | 0.44          |
| 118  | 40.459                | Quinazoline, 3, 4-dihydro-2-allylthio-4-spirocyclohexane-        | 0.37          |
| 120  | 40.965                | Hymecromone                                                      | 2.74          |
| 124  | 43.896                | Anthracene, 1, 2, 3, 4-tetrahydro-9, 10-dimethyl-                | 0.49          |
| 127  | 45.538                | 2, 3-Dihydroxypropyl elaidate                                    | 1.50          |
| 131  | 46.686                | Olean-13(18)-ene                                                 | 0.19          |
| 132  | 47.264                | Androst-5-en-17-one, 3-hydroxy-16-(phenylmethylene)-             | 0.22          |
| 135  | 47.926                | Anthraergostatetraenol benzoate                                  | 3.34          |
| 137  | 48.136                | Anthraergostatetraenol hexahydrobenzoate                         | 1.49          |
| 150  | 50.597                | Ergosta-5, 7, 9(11), 22-tetraen-3-ol, (3.beta., 22E)-            | 5.44          |
| 151  | 50.874                | 9, 19-Cyclolanostan-3-ol, acetate, (3.beta.)-                    | 0.90          |
| 153  | 51.055                | Ergosterol                                                       | 0.14          |
| 154  | 51.217                | Lycopene                                                         | 0.27          |
| 156  | 51.358                | Neoergosterol                                                    | 0.07          |
| 160  | 52.056                | Ergosta-4, 6, 8(14), 22-tetraen-3-one                            | 0.61          |
| 163  | 52.548                | Stigmasterol, 3, 4-dedihydro-, acetate(ester)                    | 0.53          |
| 165  | 53.092                | Oleana-11, 13(18)-diene                                          | 0.38          |
| 167  | 53.465                | Ergosta-4, 6, 8(14), 22-tetraen-3-one                            | 0.65          |
| 172  | 55.634                | 3.alpha., 5.alpha.-Cyclo-ergosta-7, 9(11), 22t-triene-6.beta.-ol | 1.32          |
| 173  | 55.926                | 7, 8-Epoxy lanostan-11-ol, 3-acetoxy-                            | 0.53          |

<sup>a</sup> Rt, retention time (min)
